# Supplementary material for: Defective States of Structured Light for High-Capacity Information Transmission
Source: Research Square preprint supplement (doi:10.21203/rs.3.rs-5562627/v1), 2025-01-12
Supplement: Supplementary file 1 [file 0a68c8c432d53600d15c8fb0.docx]

**Supplementary Material**

Defective States of Structured Light for High-Capacity Information Transmission

Zilong Zhang,a,b,c,* Yuqi Wang,a,b,c Lianghaoyue Zhang,a,b,c Hongzhi Yang,d Suyi Zhao,d Xiangyang Pan, a,b,c Wei He,a,b,c Yunfei Ma,a,b,c Lingyu Kong,a,b,c Lin Xiao,d and Changming Zhaoa,b,c

a School of Optics and Photonics, Beijing Institute of Technology, 5 South Zhongguancun Street, 100081 Beijing, China

b Key Laboratory of Photoelectronic Imaging Technology and System, Ministry of Education of People's Republic of China

c Key Laboratory of Photonics Information Technology, Ministry of Industry and Information Technology

d China Academy of Aerospace Science and Innovation, 100048 Beijing, China

***** Corresponding author: Zilong Zhang, E-mail: [zlzhang@bit.edu.cn](mailto:zlzhang@bit.edu.cn)

## **Performance under turbulences**

Aiming at the practical applications in long-distance information transmission, the propagation performance of the defective mode under atmosphere turbulences should be predicted. Limited by the real experiment ability, simulations are given here to prove the feasibility of our method. As the simulations are based on the well-used Von Karman model, the reliability of the results is quite high. The simulation method can be referred to in the methods section. Here, we mainly introduce the important results.

As the far field propagation does not affect the defect state of the HG mode, then the atmospheric turbulence is the very important variable should be concerned. Considering atmospheric turbulence can lead to attenuation, scintillation, absorption, beam wander and divergence, many models of atmospheric turbulence have been established. Here, we take the most known Von Karman to simulate the effect of turbulences on the mode field.

In the Von Karman model, the phase power spectrum is formulated as follows [1-3],

(S1)

Where, *z* is the linear transmission distance of the laser in atmospheric turbulence. is the structural constant of atmospheric refractive index, with <6.4×10-17 m-2/3 corresponding to weak turbulent conditions, and >2.5×10-13 m-2/3 corresponding to strong turbulent conditions [4]. is spatial frequency, and , where *L0* is turbulent outer scale, and *l0* is turbulent inner scale.

During the beam transmission process, the introduction of multiple random phase screens is done uniformly to replicate atmospheric turbulence. The simulation of atmospheric turbulence random phase screens utilizes the power spectrum inversion method. The expression for the phase screens is outlined as follows [5],

(S2)

Among them, is spatial frequency, is a Gaussian random matrix with mean 0 and variance 1.

Fig. S1 Performance of the defective HG*m,n* mode under atmospheric turbulence. **(a)** The passages of normal HG beams and defective HG beams through turbulent and non-turbulent channels. **(b)** Degraded pattern recognition accuracy. **(c)** Beam pattern variations under turbulences at different transmission distances. (**d)** Beam pattern variations under turbulences with different beam sizes at *z* = 600 m and *Cn*2=2×10-16m-2/3. **(e)** Beam pattern variations under turbulences with different turbulence levels at *z* = 600 m with ω0 = 3mm. **(f)** Evaluations on the beam pattern degradation with variation of propagation. **(g)** Evaluations on the beam pattern degradation under different turbulence levels.

**Fig. S1(a)** illustrates the passages of standard HG3,3 mode and its defective state through turbulent and non-turbulent channels. In the turbulent channel, a beam with light field *E* passes through multiple uniformly arranged random phase screens, resulting in an overall effect on *φ*. Subsequently, the beam is affected by turbulences, then it’s characterized by a new light field *E’*. The three-dimensional images on the right depict the integrated relative phase shift of the light field. The same beam with light field *E* obtains *E0’* through the non-turbulent channel. In the simulation, the transmission process at various distances *z* within atmospheric turbulence is modeled using 10-phase screens. These phase screens are spaced at intervals of *z*/10. The observation screen located at distance *z* is designated to have a resolution of 768×768. Different observation screen sizes are utilized based on the beam waist size, with specific dimensions referenced to the beam scale. We conducted simulations involving beam patterns with varying propagation distances under a weak turbulence condition to show that the mode pattern can be well recognized. **Fig. S1(b)** depicts the outcomes of degraded defect pattern recognition accuracy, with the recognition method introduced in the Methods section. The analysis revealed that, when turbulence intensity remains fixed at =2×10-16 m-2/3, the accuracy of defective pattern recognition gradually diminishes with increasing transmission distance. However, in the transmission distances within 400 m, the recognition accuracy of the defective HG mode maintains 100%, and when the distances achieve 1 km, the recognition accuracy can still be above 86%.

**Fig. S1(c)-(e)** show the obtained patterns after the defective modes passing through turbulences with different transmission distances, beam waist sizes and turbulence intensities, at the wavelength of 532 nm. Here, the corresponding normal modes are also simulated to make comparisons. Firstly, moderate turbulence with =2×10-16 m-2/3 is employed to disrupt normal and defective HG beams with a waist radius of 3 mm at varying transmission distances, as shown in **Fig. S1(c)**. As the distance increases, the structure characters of the defective mode and normal HG mode gradually diminish, while it’s still easy to distinguish the defective pattern at *z* =1 km. The beam structure exhibits pronounced distortion at *z* = 3 km; the identification of both the normal and the defective patterns becomes challenging. Secondly, beams with different widths are simulated to experience the same moderate turbulence =2×10-16 m-2/3 and propagation distance *z* = 600 m.

In this condition, the mode with a beam radius of *ω*0 = 10 mm achieves the overall lowest degradations, compared with the smaller or larger beam waists with *ω*0 = 3 and 30 mm, as shown in **Fig. S1(d)**. Thirdly, the turbulence level is taken as the variable to a defective mode with *ω*0 = 30 mm, and the patterns at *z* = 600 m are given in **Fig. S1(e)**.

To facilitate a clearer comparison between the performance of defective and normal HG modes in handling disturbances under identical turbulent conditions, both resulting patterns are assessed independently. With two important image evaluation methods, the Root Mean Square Error (RMSE) and the SSIM, the similarities between the initial and the degraded patterns of the normal mode and defective mode are analyzed respectively. Analyzation results are shown in **Fig. S1(f) and S1(g)**, which consider the propagation distances and the turbulence levels. The results demonstrate a consistent trend for both defective and normal HG modes, as propagation distance or turbulence level increases, the RMSE rises while the SSIM declines, indicating the aggravation of the pattern degradation. While, what one could observe from the curves is that both RMSE and SSIM for the normal and defective modes have a very similar tendency, especially for the SSIM. Due to RMSE as a gauge of pixel-level disparities, the spots of the normal HG beam at the locations corresponding to the defect area inside the defective mode experience more turbulence disturbance compared to the defective HG beam, resulting in generally higher RMSE values. The close SSIM index values of the normal HG beam and the defective HG beam indicate that they possess quite similar stability against turbulence, which means that the defective mode has a very close propagation property with the normal HG eigenmode in the turbulence.

## **References**

1. M. Krenn, R. Fickler, M. Fink, J. Handsteiner, M. Malik, T. Scheidl, R. Ursin & A. Zeilinger, Communication with spatially modulated light through turbulent air across Vienna, New J. Phys. **16**(11), 113028 (2014).
2. J.A. Anguita, M.A. Neifeld & B.V. Vasic, Turbulence-induced channel crosstalk in an orbital angular momentum-multiplexed free-space optical link, Appl. Opt. **47**(13), 2414-2429 (2008).
3. V. E. Ostashev, B. Brähler, V. Mellert & G. H. Goedecke, Coherence functions of plane and spherical waves in a turbulent medium with the von Karman spectrum of medium inhomogeneities, J. Acoust. Soc. Am. **104**(2), 727-737 (1998).
4. J. I. Davis, Consideration of atmospheric turbulence in laser systems design, Appl. Optics, **5**(1), 139-147 (1966).
5. R. Frehlich, Simulation of laser propagation in a turbulent atmosphere, Appl. Optics **39**(3), 393 (2000).
